# Supplementary material for: Basal-Like Cell-Conditioned Medium Exerts Anti-Fibrotic Effects In Vitro and In Vivo
Source: Front Bioeng Biotechnol. 2022 Mar 8;10:844119. doi: 10.3389/fbioe.2022.844119 (PMC8957873; doi:10.3389/fbioe.2022.844119)
Supplement: Supplementary file 4 [file Table1.XLSX]

## Sheet: Table1
Table 1: Chemical, reagents, instruments
Product	Company	Catalog Number	Country
DMEM	Thermo Fisher Scientific	41965-039	Waltham, MA, USA
FCS	Thermo Fisher Scientific	16140-063	Waltham, MA, USA
HEPES	Thermo Fisher Scientific	15630-080	Waltham, MA, USA
MEM-vitamin mix (100x)	Thermo Fisher Scientific	25030-081	Waltham, MA, USA
Antibiotic-antimycotic (100x)	Thermo Fisher Scientific	15240-062	Waltham, MA, USA
Sodium pyruvate (100x)	Thermo Fisher Scientific	11360-039	Waltham, MA, USA
AH6809	Tocris	0 671	Bristol, UK
PF04418948	Tocris	4818/10	Bristol, UK
Indomethacin	Sigma-Aldrich	I7378	St Louis, MO, USA
Bovine Serum Albumin (BSA)	Sigma-Aldrich	A3912-100G	St Louis, MO, USA
HGF ELISA	RnD Systems	DHG00	Abingdon, UK
MMP1 ELISA	RnD Systems	DY901B	Abingdon, UK
TIMP1 ELISA	RnD Systems	DTM100	Abingdon, UK
Proteome Profiler™ Human XL Cytokine Array kit	RnD Systems	ARY022	Abingdon, UK
PGE2 parameter assay kit	RnD Systems	KGE004B	Abingdon, UK
2,2'-Azino-bis-(3-ethylbenzo thiazoline)-6-sulfonic acid	Sigma-Aldrich	A3219-100ML	St Louis, MO, USA
Quick-RNA MiniPrep Kit	ZymoResearch	R1050	Orange, CA, USA
KRT5 TaqMan® Gene Expression Assay	Thermo Fisher Scientific	Hs00361185_m1	Waltham, MA, USA
KRT17 TaqMan® Gene Expression Assay	Thermo Fisher Scientific	Hs00356958_m1	Waltham, MA, USA
Col1A1 TaqMan® Gene Expression Assay	Thermo Fisher Scientific	Hs01076777_m1	Waltham, MA, USA
α-SMA TaqMan® Gene Expression Assay	Thermo Fisher Scientific	Hs00426835_g1	Waltham, MA, USA
MMP-1 TaqMan® Gene Expression Assay	Thermo Fisher Scientific	Hs00899658_m1	Waltham, MA, USA
TIMP-1 TaqMan® Gene Expression Assay	Thermo Fisher Scientific	Hs00171558_m1	Waltham, MA, USA
GAPDH TaqMan® Gene Expression Assay	Thermo Fisher Scientific	Hs03929097_g1	Waltham, MA, USA
TaqManTM Universal PCR Master Mix, no AmpEraseTM UNG	Thermo Fisher Scientific	4324018	Waltham, MA, USA
anti-Collagen I antibody	Abcam	ab34710	Cambridge, MA, USA
anti-rabbit HRP	Sigma-Aldrich	RABHRP1	St Louis, MO, USA
KRT5 antibody	Thermo Fisher Scientific	MA5-12596	Waltham, MA, USA
KRT17 antibody	Thermo Fisher Scientific	PA5-27949	Waltham, MA, USA
Alexa-Fluor-coupled anti-mouse antibody	Thermo Fisher Scientific	AF647	Waltham, MA, USA
Alexa-Fluor-coupled anti-rabbit antibody	Thermo Fisher Scientific	AF555	Waltham, MA, USA
α-SMA antibody	Abcam	ab5694	Cambrdige, UK
α-Tubulin antibody	Cell Signaling Technology	2125	Danvers, MA, USA
DAPI	Thermo Fisher Scientific	62248	Waltham, MA, USA
Ti2 fluorescence microscope	Nikon	-	-
Insyte 14 GA i.v catheter	BD Biosciences	381467	Franklin Lakes, NJ, USA
PGE2 neutralizing antibody	Cayman chemical company	18219	Ann Arbor, MI, USA
Isotype PGE2	Abcam	ab205718	Cambrdige, UK
Picro Sirius Red	Sigma-Aldrich	365548-5G	St Louis, MO, USA
Polnik HRP Immunohistochemistry kit	GBI Labs	DS202D-6	Bothell, WA, USA
Leica DM4000D	Leica AG	-	Germany
rat α-SMA antibody	Sigma-Aldrich	F3777	St Louis, MO, USA
trichloroactic acid (TCA)	Sigma-Aldrich	91230	St Louis, MO, USA
hydrochloric acid	Sigma-Aldrich	H1758	St Louis, MO, USA
chloramin T-reagent	Sigma-Aldrich	G900	St Louis, MO, USA
perchloric acid	Sigma-Aldrich	311421	St Louis, MO, USA
Ehrlich reagent (p-dimethylaminobenzaldehyde)	Sigma-Aldrich	D2004	St Louis, MO, USA
hydroxyproline	Sigma-Aldrich	PHR1939	St Louis, MO, USA
Collagenase I	Worthington Biochemical Corporation	LS004194	Lakewood, NJ, USA
Collagenase II	Worthington Biochemical Corporation	LS004174	Lakewood, NJ, USA
LIVE/DEADTM staining kit	Thermo Fisher Scientific	L10119	Waltham, MA, USA
BD LSR-II instrument	BD Biosciences	-	Franklin Lakes, NJ, USA
FlowJo	Tree Star	-	Ashland, OR, USA
IL-17A	PeproTech	200-17	Rocky Hill, NJ, USA
Osteopontin	PeproTech	120-35	Rocky Hill, NJ, USA
ENA-78	PeproTech	300-22	Rocky Hill, NJ, USA
GM-CSF	PeproTech	300-03	Rocky Hill, NJ, USA
HGF	RnD Systems	294-HG	Abingdon, UK
GDF-15	RnD Systems	957-GD	Abingdon, UK
GRO-α	RnD Systems	275-GR	Abingdon, UK
IL-6	RnD Systems	206-IL	Abingdon, UK
PGE2	RnD Systems	2296	Abingdon, UK
IL-8	Millipore	IL008	Bedford, MA, USA
